# Supplementary material for: A three-dimensional in vitro dynamic micro-tissue model of cardiac scar formation
Source: Royal Society of Chemistry journal article supplement (doi:10.1039/c7ib00199a), 2018-01-01
Supplement: c7ib00199a1.pdf [file c7ib00199a1.pdf]

## Supplementary data

### **Three-dimensional *in vitro* dynamic micro-tissue model recapitulating the main steps of cardiac scar formation**

Paola Occhetta<sup>\*a</sup>, Giuseppe Isu<sup>\*a</sup>, Marta Lemme<sup>a,b</sup>, Chiara Conficconi<sup>a,b</sup>, Philipp Oertle<sup>c</sup>, Christian Rätz<sup>c</sup>, Roberta Visone<sup>b</sup>, Giulia Cerino<sup>a</sup>, Marija Plodinec<sup>c</sup>, Marco Rasponi<sup>b</sup>, Anna Marsano<sup>a</sup>

**(a) Culture chamber**

i. SU8-2050 spincoating

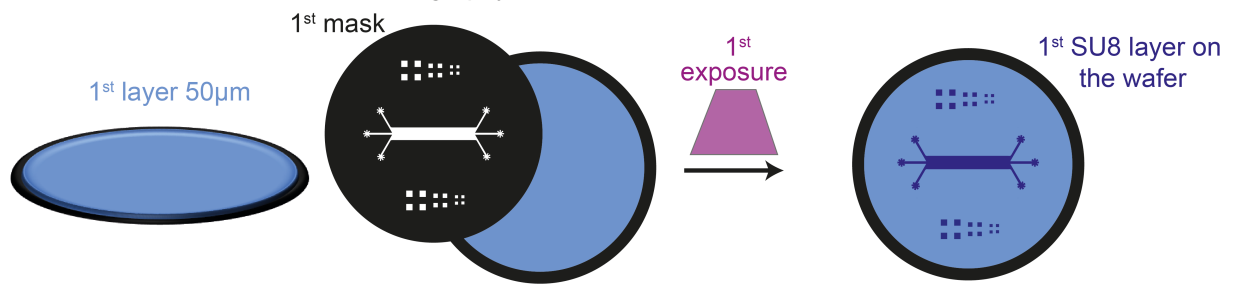

ii. SU8-2050 spincoating

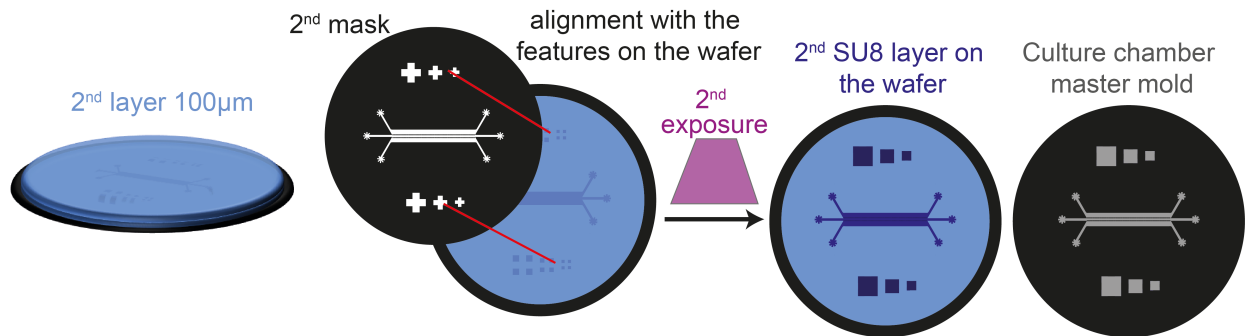

**(b) Actuation chamber**

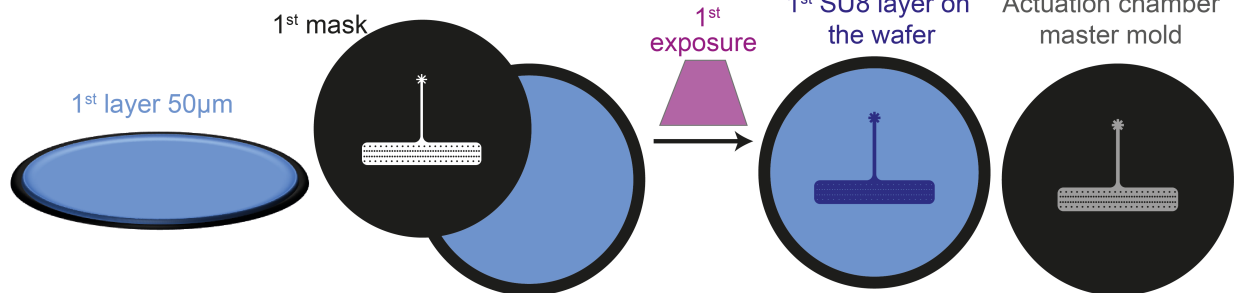

**Figure S11. Master mold fabrication.** (a) Fabrication steps to obtain the master mold of the culture chamber: i) first SU8 photoresist layer deposition and exposure through the features on the first photomask depicting the culture chamber and ii) subsequent second SU8 layer deposition and exposure after the alignment with the second photomask including the two rows of posts. (b) Fabrication steps to obtain the master mold of the actuation chamber: one SU8 layer deposition and single exposure through the photomask depicting all the features of the actuation compartment.
